# Supplementary material
Source: HighWire-hosted journal article supplement (https://bmjopen.bmj.com/content/11/3/e044695)
Supplement: inline-supplementary-material-1 [file inline-supplementary-material-1.pdf]

## Patient Consent Form

筛选号: □□□□□□

### 房颤患者左心耳封堵术后 停用阿司匹林的安全性研究

## 知情同意书

(第5版, 2020年05月14日)

受试者姓名:

联系地址:

联系电话:

研究中心名称: 上海交通大学医学院附属新华医院

研究中心编号:

申办方: 上海交通大学医学院附属新华医院

## 知情同意书·告知页

尊敬的\_\_\_\_\_先生/女士：

我们真诚地邀请您参加“房颤患者左心耳封堵术后停用阿司匹林的安全性研究”。本研究由上海交通大学医学院附属新华医院心血管内科进行。在您同意参加本项研究之前，请您仔细阅读这份知情同意书，它将为您提供本研究背景、目的、方法、试验过程中给您带来的益处和可能产生的风险或者不变以及您的权益保护等内容。本知情同意书提供给您的信息可以帮助您决定是否参加此项研究。如有任何疑问可以向该项目的研究者咨询，以确保您充分理解有关的内容。如果您同意参加本研究，请您签署知情同意书，并且保存一份双方签字的知情同意书。本研究方案已通过新华医院医学伦理委员会批准。

### 1、为什么要参加这项研究？

本研究背景：心房颤动简称房颤，是最常见快速性持续性心律失常，房颤总的发病率为0.4%-1%，随着年龄增长房颤的发生率不断增加，75岁以上人群可达10%。房颤时心房率达500-600次/分，心室率可以达到100-180次/分，而且绝对不齐，心房失去有效的收缩功能，严重影响心功能。我国大规模调查研究显示房颤患病率为0.77%，男性房颤患病率(0.9%)高于女性(0.7%)，80岁以上房颤患病率达7.5%。此外房颤患病率的增长还与冠心病、高血压病和心力衰竭等疾病的生长密切相关，未来50年房颤将成为最流行的心血管疾病之一。

房颤治疗目的包括：(1)恢复窦性心律：是房颤治疗的最佳结果。只有恢复窦性心律(正常心律)，才能达到完全治疗房颤的目的；所以对于任何房颤病人都应该尝试恢复窦性心律的治疗方法。(2)控制快速心室率：对于不能恢复窦性心律的房颤病人，可以应用药物减慢较快的心室率。(3)防止血栓形成和中风：在房颤时如果不能恢复窦性心律，或危险因素较多，CHA<sub>2</sub>DS<sub>2</sub>-VASc评分较高可以应用抗凝药物预防血栓形成和中风的发生。

虽然目前抗心律失常药物和抗凝药物依然是房颤治疗的重要方法，但各种毒副作用很大程度限制了它们的临床使用。新近发展的左心耳封堵术，采用封堵器封堵住左心耳，研究表明其可降低90%卒中风险，与经典的抗凝药物华法林相比可进一步降低脑卒中风险，且同时可明显降低大出血风险，引起学界的认可和广泛关注。我中心目前常规开展左心耳封堵术、房颤射频消融术及左心耳封堵+房颤射频消融术“一站式”治疗房颤，以期最大程度提高房颤治疗的效果和安全性，为患者带来更多获益。

根据目前国际惯例，患者使用WATCHMAN封堵器行左心耳封堵术时，常规抗栓治疗策略为术后前45天服用华法林及阿司匹林，之后维持双联抗血小板治疗(DAPT)至术后6个月，最后使用阿司匹林进行终身抗凝治疗。若患者禁忌使用华法林，封堵器置入后，前6个月可使用氯吡格雷联合阿司匹林进行双联抗血小板，替代口服抗凝药，6个月后终身服用阿司匹林。

长期以来，阿司匹林一直被用于卒中、冠心病等血管疾病的一级、二级预防。然而，2018年ARRIVE、ASCEND、ASPREE三项重要随机对照研究提示：长期服用阿司匹林进行一级预防不但没有降低心、脑血管事件风险，反而显著增加出血风险。阿司匹林在左心耳封堵术后长期应用的疗效及安全性尚未明确。对于能否/何时停用抗小板药物，目前国际上尚无相关研究报道。

本研究的目的是：观察左心耳封堵术或左心耳封堵+射频消融术后6月开始停用阿司匹林的安全性，以期在房颤患者左心耳封堵术后尽早停用阿司匹林，降低出血风险，提高患者生活质量。

### 2、哪些人可以参加这项研究？

**(1) 入选标准:**

- 1) 非瓣膜性房颤, 6个月前曾接受过左心耳封堵术, 包括左心耳封堵+射频消融术一站式
- 2) 18-90周岁(含18和90周岁)
- 3) 提供愿意参加研究、顺从随访试验及评估程序的知情同意书;

**(2) 排除标准:**

- 1) 合并冠心病、脑卒中等疾病需长期服用阿司匹林进行二级预防
- 2) 存在急性病变, 如心梗后急性期(3个月内), 心衰急性发作或新发脑梗后3个月内;
- 3) 预期寿命少于1年;
- 4) 年龄>90周岁
- 5) 具有活动性消化道溃疡或其他出血性疾病等阿司匹林使用禁忌症
- 6) 癌症未控制患者;
- 7) 明显肝肾功能、凝血功能异常;
- 8) 术后6月内经食道心脏超声提示器械相关血栓或具有残余漏>5mm
- 9) 女性怀孕期、哺乳期、正计划怀孕者, 或育龄妇女但未采取可靠避孕方法者。

**3、多少人参加这项研究?**

本研究为多中心临床试验, 预计总共1120人将参与本项研究, 阿司匹林组和安慰剂组各560人。其中本中心预计入选500人。

**4、研究是怎样进行的?**

本研究为前瞻性、多中心、随机、双盲、安慰剂对照的临床试验, 一组于左心耳封堵术或左心耳封堵+射频消融术术后6月开始使用阿司匹林2年, 另一组: 左心耳封堵术或左心耳封堵+射频消融术术后6月继续使用安慰剂2年。

随机是指研究人员与受试者双方都不知道哪一名参与研究的受试者会分配到两组中的哪一组, 采用电脑中的随机程序, 类似“抽签”或“抛硬币”的方法进行分组。受试者分配到任何一组的几率都是均等的, 受试者从电脑中获取数值为0或1, 根据获得的数字进行分组, 其中0代表阿司匹林组, 于左心耳封堵术后第6月继续使用阿司匹林(100mg)2年, 1代表安慰剂组, 于左心耳封堵术后6月开始使用安慰剂2年。您有50%的几率进入任意一组。

具体研究步骤为: 对有意向参与本研究且符合入选标准的患者, 在左心耳封堵术后6月签署知情同意书并且符合入选标准的患者纳入研究; 基线评估包括: 心电图/Holter、超声心动图、食道超声、心脏CT、疾病史、药物史。

左心耳封堵术或左心耳封堵+房颤消融术后6月开始随机化, 之后的第6月、12个月, 以及以后每12个月随访1次。

随访时主要监测卒中、系统性栓塞、大出血、心血管/不明原因死亡、急性冠脉综合征或冠心病需血运重建、外周血管疾病需血运重建等情况。每次随访需按照方案进行检查, 并记录用药情况、主要临床事件和生活质量评分。随访过程中, 如有心悸等不适症状应及时就诊行ECG检查和Holter。如有头晕、肢体活动障碍、感觉障碍及其他怀疑脑梗症状, 需完善头颅CT或MRI检查。

**5、参加本研究可能的风险与不良反应**

本研究开始于左心耳封堵术后6月。因此左心耳封堵术围术期相关的风险与本研究无关。随机化分组后, 一组使用阿司匹林治疗, 另一组使用安慰剂。对继续服用阿司匹林的患者。您可能出现与阿司匹林相

关的副作用和不良反应，包括出血、哮喘、胃肠道不适等。如果您有任何不适，或者病情发生新的变化，或任何意外情况，不管是否与药物有关系，均应及时通知研究医生，研究医生将对此作出判断和医疗处理。对停用阿司匹林的患者，停用阿司匹林可能增加脑梗塞、系统性栓塞、心梗、外周血管梗塞、封堵器相关血栓的风险。如果您有任何不适，或者病情发生新的变化，或任何意外情况，不管是否与药物有关系，均应及时通知研究医生，研究医生将对此作出判断和医疗处理。其他风险：还可能存在一些目前无法预知的风险、不适，药物相互作用或不良反应。我们将对您进行生活质量评估，问卷中某些问题可能会让您感到不舒服，您可以拒绝回答。

## 6、参加本研究有什么获益吗？

参加本试验，研究医生将会为您建立术后 2 年的健康随访档案，对您术后的健康状况提供一定的指导建议。此外您的参加将对我们进一步优化房颤介入治疗策略，提高房颤的治疗成功率，降低脑卒中、大出血发生有较大帮助，有益于人类最终攻克心房颤动这一疾病。

## 7、如果不参加此项研究，有没有其他备选治疗方案？

目前针对您的健康情况，常规的治疗方法为继续口服阿司匹林 100mg，每天一次。如果您决定不参加这项研究，您将会得到其他的标准化的治疗，即口服阿司匹林 100mg，每天一次。您的研究医生也会乐意解释用于治疗您的疾病的其他疗法的可能的的好处和风险。

## 8、是否一定要参加并完成本项研究？

您是否参加这个研究完全是自愿的。如果您不愿意，可以拒绝参加，这对您目前或未来的卫生医疗不会有任何负面影响。即使您同意参加之后，您也可以在任何时间改变主意，告诉研究者退出研究，这同样不会影响您获得正常的医疗服务。当您决定不再参加本研究时，希望您及时告知您的研究医生，研究医生可就您的健康状况提供建议和指导。

一旦有任何可能会影响您决定是否继续参与本研究的信息，我们会及时告知您。研究机构也可能在研究期间终止本研究。如果发生本研究提前终止的情况，我们将及时通知您，您的研究医生会根据您的健康状况为您下一步的治疗计划提供建议。

对于中途退出的受试者，出于安全性考虑，我们有末次随访计划，您有权拒绝。若您退出后，发现新的与您健康和权益相关的信息时，我们可能会再次与您联系。

原则上，在您退出之后，研究者将严密保存您的相关信息直至最终销毁，期间不会继续使用或透露这些信息。但在以下极少数情况下，研究者将继续使用或透露您的相关信息，即使您已经退出研究或研究已经结束。这些情况包括：

- 除去您的信息将影响研究结果的科学性或对数据安全的评价；
- 为研究、教学或其他活动提供一些有限的信息（这些信息不会包括您的姓名、身份证号码、或者其他能识别您身份的个人信息）；
- 当学校和政府监管部门需要监督研究时，他们会要求查看所有的研究信息，其中也会包括您当时参与研究的相关信息。

## 9、参加此项研究的费用

本研究的阿司匹林和安慰剂费用均为免费提供。本研究的其他检查、药品费用均不在免费范围之内。如果您同时合并其他疾病所需的治疗和检查，以及因治疗无效而改用其他治疗的费用和交通费用也不在免费的范围之内。

**10、参加该项研究受试者是否获得报酬？**

参加本研究没有报酬。

**11、发生研究相关伤害的处理**

如果您在研究期间发生了任何伤害，请及时告知研究者，您可以在您所在的研究医院获得积极治疗。如果您在研究期间发生了不良事件，该不良事件是否由本研究方案所需的诊断检查有关，应由研究者作出判断。确因本研究方案所需诊断检查及治疗引起不良事件并对造成伤害的可以根据医疗鉴定结果给予相应赔偿。如您没有遵从本知情同意书上的要求，或未按研究医生根据本临床试验方案给您的要求，研究机构将不会承担您的医疗费用。

**12、受试者的个人信息会得以保密吗？**

如果您决定参加本项研究，您参加研究及在研究中的个人资料均属保密。可以识别您身份的信息将不会透露给研究小组以外的成员，除非获得您的许可。所有的研究成员和研究申办者都被要求对您的身份保密。您的档案将保存在有锁的档案柜中，仅供研究人员查阅。为确保研究按照规定进行，必要时，政府管理部门或伦理委员会的成员按规定可以在研究单位查阅您的个人资料。这项研究结果发表时，将不会披露您个人的任何资料。

**13、如果有问题或困难，该与谁联系？**

您可以随时了解与本研究有关的信息资料和研究进展，如果您有与本研究有关的问题，或您在研究过程中发生了任何不适与损伤，请可以联系您的研究医生：陈牧 电话：13585757166。如果在研究过程中您有相关权益方面的问题，可以联系新华医院医学伦理委员会，联系电话：021-25076143。

## 知情同意书·签字页

### 受试者知情同意声明

我已经阅读了这份知情同意书，并充分理解所有内容。

我有机会提问而且所有问题均已得到解答。

我理解参加本项研究是自愿的。

我可以选择不参加本项研究，我的任何医疗待遇与权益不会因此而受到影响。

如果我需要其它治疗，或者我没有遵守研究计划，或者发生了与研究相关的损伤或者有任何其它原因，研究医师可以终止我继续参与本项研究。

我将收到一份签过字的“知情同意书”副本。

受试者姓名：\_\_\_\_\_ 法定代理人签名：

受试者签名：\_\_\_\_\_ 与受试者关系：

受试者电话：\_\_\_\_\_ 法定代理人电话：

日期：\_\_\_\_年\_\_月\_\_日 日期：\_\_\_\_年\_\_月\_\_日

(注：如果受试者无行为能力时则需法定代理人签名)

### 研究者告知声明

我已经向该受试者或其法定代理人详细介绍了该研究的目的、方法、程序及研究的风险和获益等；给与他/她足够的时间阅读知情同意书、与他人讨论，并回答了他/她提出的所有问题；我已经告知该受试者当遇到问题时的联系方式；我已告知该受试者或其法定代理人他/她在研究期间的任何时候无需任何理由退出本研究。

研究者姓名：

研究者签名：

研究者电话：

日期：\_\_\_\_年\_\_月\_\_日
